# Supplementary material for: A Dyadic Behavioral Intervention to Optimize Same Sex Male Couples’ Engagement Across the HIV Care Continuum: Development of and Protocol for an Innovative Couples-based Approach (Partner Steps)
Source: PubMed Central journal article supplement (PMC5016626; doi:10.2196/resprot.6271), 2016-08-25
Supplement: resprot_v5i3e168_app2.pdf [file resprot_v5i3e168_app2.pdf]

### Multimedia Appendix 1: Sources for Development of Partner Steps Pre-Adherence Content

| Pre-Adherence Steps:                                                  | 1. Coping with HIV | 2. Health insurance | 3. Healthcare navigation | 4. Trouble remembering to make or attend appointments | 5. Transportation | 6. Trouble with housing | 7. Comfort with providers | 8. Communicating with providers | 9. Fear of drug side effects | 10. Lack of interest in receiving care | 11. Managing mood | 12. Substance use |
|-----------------------------------------------------------------------|--------------------|---------------------|--------------------------|-------------------------------------------------------|-------------------|-------------------------|---------------------------|---------------------------------|------------------------------|----------------------------------------|-------------------|-------------------|
| IAPAC Guidelines                                                      | X                  | X                   | X                        | X                                                     | X                 | X                       | X                         | X                               | X                            | X                                      | X                 | X                 |
| White House Care Continuum Initiative                                 | X                  | X                   | X                        | X                                                     | X                 | X                       | X                         | X                               | X                            | X                                      | X                 | X                 |
| Literature Review                                                     | X                  | X                   | X                        | X                                                     | X                 | X                       | X                         | X                               | X                            | X                                      | X                 | X                 |
| CHTC Skills                                                           | X                  |                     |                          |                                                       |                   |                         |                           |                                 |                              |                                        |                   |                   |
| Life-Steps: getting to appointments                                   |                    |                     |                          | X                                                     | X                 |                         |                           |                                 |                              |                                        |                   |                   |
| Life-Steps: communication with physicians and other medical personnel |                    |                     |                          |                                                       |                   |                         | X                         | X                               |                              |                                        |                   |                   |
| Life-Steps: coping with side effects                                  |                    |                     |                          |                                                       |                   |                         |                           |                                 | X                            |                                        |                   |                   |
